# Supplementary material for: Clinical, immunological and bacteriological characteristics of H7N9 patients nosocomially co-infected by Acinetobacter Baumannii: a case control study
Source: Springer Nature journal article supplement (doi:10.1186/s12879-018-3447-4), 2018-12-01

# Supplemental Figure S1

**A**

Fatal

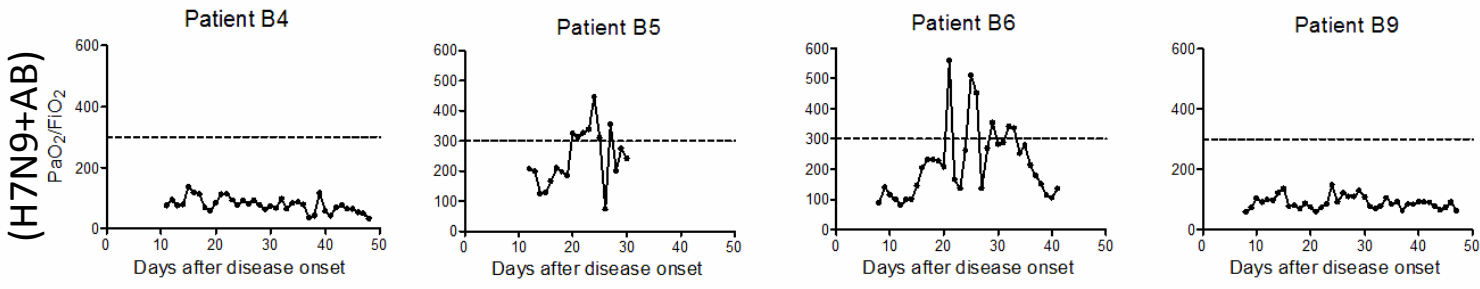

**B**

Survivors

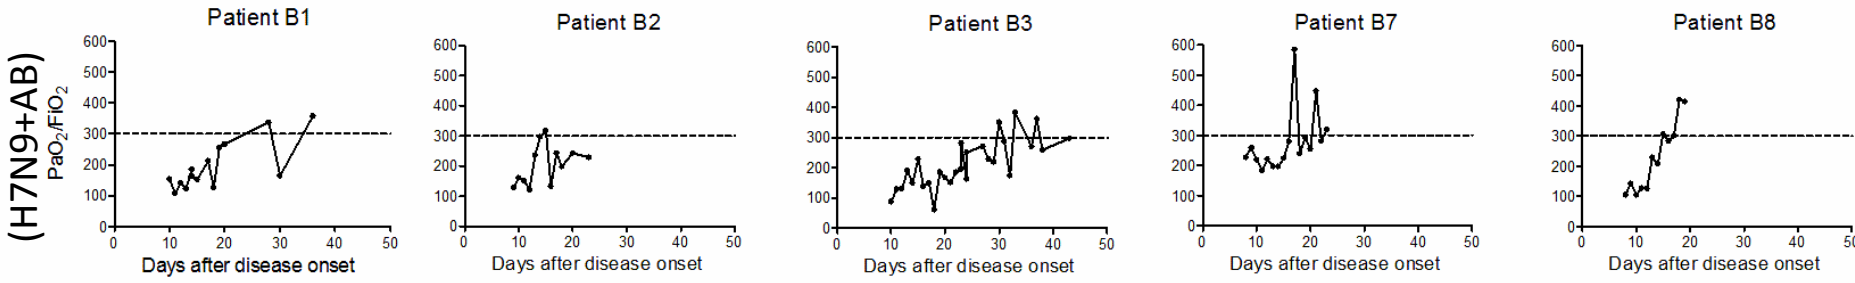

Supplement: MOESM6 [file 16343492]
